RESEARCH ARTICLE

# Intensive care nurses' knowledge and practice on endotracheal suctioning of the intubated patient: A quantitative cross-sectional observational study

Emelia T. Mwakanyanga<sup>1\*</sup>, Golden M. Masika<sup>2#</sup>, Edith A. M. Tarimo<sup>3</sup>

**1** MUHAS Academic Medical Centre (MAMC), Dar es Salaam, Tanzania, **2** School of Nursing, College of Health Sciences, The University of Dodoma, Dodoma, Tanzania, **3** Department of Nursing Management, School of Nursing, Muhimbili University of Health and Allied Sciences, Dar es salaam, Tanzania

# Current address: The Nethersole School of Nursing, Chinese University of Hong Kong, Hong Kong city, Hong Kong.

\* [emeliatausen@yahoo.com](mailto:emeliatausen@yahoo.com)

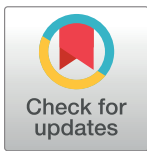

**OPEN ACCESS**

**Citation:** Mwakanyanga ET, Masika GM, Tarimo EAM (2018) Intensive care nurses' knowledge and practice on endotracheal suctioning of the intubated patient: A quantitative cross-sectional observational study. PLoS ONE 13(8): e0201743. <https://doi.org/10.1371/journal.pone.0201743>

**Editor:** Steven Talbert, University of Central Florida, UNITED STATES

**Received:** December 24, 2017

**Accepted:** July 20, 2018

**Published:** August 16, 2018

**Copyright:** ©2018 Mwakanyanga et al. This is an open access article distributed under the terms of the [Creative Commons Attribution License](https://creativecommons.org/licenses/by/4.0/), which permits unrestricted use, distribution, and reproduction in any medium, provided the original author and source are credited.

**Data Availability Statement:** All relevant data are within the paper and its Supporting Information files.

**Funding:** The Authors received a generous financial support "in a small grant" during research study from Ministry of Health and Social Welfare (MOHSW)-Tanzania, through Muhimbili University of Health and Allied Sciences (MUHAS) which did not include the publication of the manuscript. The funders had no role in study design, data collection

## Abstract

### Introduction

Endotracheal suction (ETS) is a common invasive procedure which is done to keep the airways patent by mechanically removing accumulated pulmonary secretions to all in patients with artificial airways. Many life-threatening complications can occur when the procedure is not performed correctly. Although the evidence-based recommendations regarding ETS are available, many of these have not been observed in nurse's clinical practice. We assessed the intensive care nurses' knowledge and practice of ETS to intubated patients in selected hospitals in Dar es Salaam, Tanzania.

### Methodology

A descriptive cross-sectional study design involving 103 Intensive Care Unit (ICU) nurses in Dar es Salaam city was conducted in 2014. Data were analyzed using SPSS version 20 where descriptive statistics were employed to interpret data.

### Results

Majority of ICU nurses (69.9%) knew the indication for the procedure, (77.7%) knew the action to be taken in case of abrupt change in the ECG monitor; however, 80.6% demonstrated undesirable overall knowledge on ETS evidence-based recommendations. Nurses with ICU training (57.3%) significantly demonstrated higher knowledge of ETS than non-trained nurses ( $P < 0.005$ ), while all other factors had no influence.

### Conclusions and recommendations

Majority of ICU nurses do not have desirable knowledge and skills of ETS, and are currently not following current ETS recommendations. This study has shown that training on ICU

and analysis, decision to publish, or preparation of the manuscript.

**Competing interests:** The authors have declared that no competing interests exist.

skills have positive influence to recommended ETS knowledge. We recommend ICU training, provision of clinical guidelines and adequate support to nurses employed in ICUs. Also, further studies using analytical approach to identify other factors beyond the scope of this study and testing the best approach in fostering adherence to ETS evidence-based recommendations are crucial.

## Introduction

Endotracheal suction (ETS) is a common invasive procedure which aims at keeping airways of the patient with endotracheal tube patent by mechanically removing accumulated pulmonary secretions [1–3]. Intubated patients often have an increased production of mucous and weakened ability to clear airway secretion which may pose some risks to the patient including infection (pneumonia) and atelectasis [4,5]. Therefore, ETS is a life-saving procedure to enhance clearance of respiratory tract secretion, improve oxygenation and prevent atelectasis [6].

Despite of ETS being a necessary procedure to both children and adult patients, if the procedure is not performed with correct techniques, it can lead to serious complications, such as bleeding, infection, hypoxia, bronchoconstriction, atelectasis, increase in intra-cranial pressure, cardiac arrest and sudden death [3,5,7–13]. Since the procedure can cause harm to the patient if it is done incorrectly, it is important therefore that Intensive Care Unit (ICU) nurses have the necessary knowledge and skills based on valid scientific evidence in performing ETS and aspects related to it. Wood (1998) as cited by Ansari et al (2012) demonstrated that, performing suctioning by well-educated nurses based on checking for patient's need, has better outcomes and fewer side effects than performing it routinely at every two hours [10]. One Cochrane review on the frequency of ETS to neonates identified only one article which was also outdated and therefore failed to recommend on the frequency of suctioning [14]. However, their review agrees on American Association for Respiratory Care Practice Guidelines that only when secretions are present, ETS suctioning can be performed, indicating that knowledge and skills of patient assessment is a pre-requisite.

As also indicated by many studies [5,7,15–18], a literature review by Pedersen et al (2009) isolated and recommended 11 guidelines for acceptable ETS that are associated with minimal complications. The recommendations are summarized in Table 1.

Unsafe endotracheal suction practices remain the problem worldwide [2]. Although scientific evidence for the safe and efficient accomplishment of endotracheal suction are available, many of these recommendations have not been observed in nurses' clinical practice, perhaps due to poor knowledge about this procedure [2,3]. Different evidence has shown that nurses often perform procedures traditionally / routinely, regardless of established ETS evidence-based recommendations. That indicates the existence of gaps between scientific knowledge and common practice [19–22], and the reasons identified for nurses not to incorporate the recommendations into clinical practice include: resistance to change, little support from managers, lack of ICU training, lack of ease access to the literature, and lack of time to read and understand the literature, competing workload pressures, poor change management process and lack of access to guidelines [19,23,24].

In Tanzania, the knowledge and practice of ETS for intubated patients using the available evidence-based recommendations are under-researched and therefore neither the prevailing knowledge and practice nor the induced complications from ETS practice of ICU nurses are well known. The study done by Said (2012) at Muhimbili National Hospital on knowledge and

**Table 1. Recommended guidelines for endotracheal suctioning.**

| SN | GUIDELINES                 | RECOMMENDED                                                                                                                                                                 |
|----|----------------------------|-----------------------------------------------------------------------------------------------------------------------------------------------------------------------------|
| 1  | Frequency                  | ETS should be performed only when necessary                                                                                                                                 |
| 2  | Suctioning catheter        | Should occlude less than half of the lumen of the ETT                                                                                                                       |
| 3  | Suctioning pressure        | Should be lowest as much as possible, usually 80–120 mmHg                                                                                                                   |
| 4  | Depth of suctioning        | Minimum invasion to the length of the ETT only                                                                                                                              |
| 5  | Time of suctioning         | Should last no longer than 15 seconds                                                                                                                                       |
| 6  | Continuous vs Intermittent | Should be continuous rather than intermittent suctioning during the individual suction procedure                                                                            |
| 7  | Normal Saline instillation | No routine instillation of normal saline (N/S) prior to ETS                                                                                                                 |
| 8  | Oxygenation                | There should be pre-oxygenation by the delivery of 100% oxygen for at least 30 seconds prior to and after the suctioning procedure to prevent decrease in oxygen saturation |
| 9  | Hyperinflation             | Hyper-oxygenation prior to suctioning should be combined with hyperinflation (20–30 cmH <sub>2</sub> O)                                                                     |
| 10 | Infection Control          | Aseptic technique should be used for infection control                                                                                                                      |
| 11 | Closed vs Open suctioning  | Both open and closed suction systems are recommended                                                                                                                        |

<https://doi.org/10.1371/journal.pone.0201743.t001>

practice on prevention of ventilator associated pneumonia among ICU nurses reported only one item of ETS recommendation (practice of hand washing before and after ETS procedure), and only involved a small sample of nurses [25].

We therefore report the knowledge and practice of ICUs nurses on ETS among ICU intubated patients in five hospitals of Dar es Salaam, Tanzania.

## Methods

### Design and settings

This study used a descriptive cross-sectional observational design. Five hospitals with ICUs in Dar es Salaam namely Muhimbili National Hospital (MNH), Muhimbili Orthopaedic Institute, Agakhan hospital, Hurbert Kairuki Memorial Hospital, and T. M. J Hospital were involved. These were the only hospitals in Dar es Salaam with ICUs where the population of nurses who practice ETS could be found.

### Study population

The study population involved nurses working in ICUs of five hospitals in Dar es Salaam. They comprise of 122 nurses, and their ICUs provide care to both children and adults. Due to their small population, all were targeted to respond to the questionnaire and be assessed for endotracheal tube suctioning practices. A total of 19 participants were excluded from the study (6 nurses were on annual leave, 4 on study leave, 5 nurses were the ICU managers, not providing bedside care and 4 refused to consent for the study). The remaining 103 (84.4%) signed the informed consent and took part in the study. Of 103 nurses who consented for the study, all of them responded to the questions and 35 nurses were observed for their endotracheal suction practices.

### Data collection tools

Self-administered questionnaire and observational checklist were used to collect data. Both questionnaire and observational checklist were developed by the research group by adapting

the constructs from the current ETS recommendations [26]. The tools were then reviewed by the colleagues who were not part of the investigation team, and then pretested to ten (10) nurses working in the Highly Dependent Unit (HDU) of the Muhimbili National Hospital, where also ETS was routinely done as one of the procedures to patients in the unit. Through pretesting of the tools, one question in the questionnaire was corrected for clarity. The questionnaire consisted of 6 items on demographic information, and 19 structured closed ended multiple-choice questions assessing knowledge on ETS in relation to evidence-based recommendations.

The observation checklist was adopted from Jansson et al 2013 with few items removed or slightly altered in reflection of the local practice of Tanzanian context [2].

## Data collection procedures

**Administering the questionnaire.** Participants were recruited by research assistants under the supervision of the first Author (E.T.M). The research assistants were nurses working in different departments within the participating hospitals. To each participant, detailed information about this research was provided on first encounter and then each participant was asked to sign a consent form. After acceptance, every participant was given the questionnaire to self-read the questions and then provide responses. Participants were given at least two hours to complete the questionnaire before collecting it back. All participants were able to read the questions and provide answers without needing clarifications from the research assistants.

**Observation of practice.** Observation of practice included the overall procedure of endotracheal tube suctioning of the intubated patients. This was done through observation of nurse-patient interaction during suction procedure using standardized checklist and measured against evidence-based recommendations. Stopwatch was used in determining the duration of suctioning, and the optimal cuff pressure by observing nurses inflating the cuff slowly until the wheezing sound disappear or deflating to loosen the tight cuff. Observation was conducted on 34% (n = 35) nurses in a natural ICU environment. Nurses from all the five hospitals contributed to observation data: Muhimbili National Hospital, n = 10, Muhimbili Orthopedic Institute, n = 8, Aga-khan Hospital, n = 6, Hurbert Kairuki Memorial Hospital, n = 5, and T. M. J Hospital, n = 6. Nurses were made aware during informed consent that they were going to be observed for their practice however they were not given the details of items being observed. Two observation encounters were made and the average score for the two observations for each nurse was considered final. All observation data were collected by the first author. Four items were assessed during observation i.e.

- **Practices prior to ETS event**—patient assessment, chest auscultation, pre-suctioning hyper-oxygenation, and cuff pressure checking.
- **Infection-control practice**—hand disinfection prior to suctioning, self-protection, and maintaining sterility of suction catheter until inserted into airway.
- **The ETS events**—sodium chloride instillation, size of suction catheter ( $\leq$  half of internal diameter of ETT), number of suction passes  $\leq$  2, duration of suction applied to airway ( $<$  15 seconds), level of suction pressure 80-150mmHg
- **Post ETS practice**—patient reconnected to oxygen within 10 seconds post suctioning, post-suctioning hyper oxygenation, post-ETS assessments: patients' chest auscultation after suctioning, patient reassured, hand disinfection post suctioning, proper way of disposing used catheter and gloves post suctioning, cuff pressure checked.

## Data analysis

Data from both structured questionnaires and checklist were analyzed using SPSS program version 20. Demographic data categorized into gender, level of education, years of working in ICU, and ICU training were analyzed for descriptive statistics, which in turn were used as independent variables for their relationship with knowledge and practice of ETS. Scoring of knowledge and practice were made in percentile based on the number of items a participant would score. Each questionnaire and checklist items were valued at 1-point score, then the average of score for both knowledge and practice was calculated in percentages. The quality of performance was categorized into three levels based on the sum of scores to individual items; desirable (76–100%), moderate (50–75%) and undesirable (< 50%) [10]. Chi-square, Fisher's exact test and mid P exact test were used to identify the significance in the observed differences in knowledge and practice of ETS scores by the independent variables: level of education, years of working in ICU, and ICU training, considering statistically significant at p-value less than 0.05. All results assumed a two-tailed distribution with an alpha level of 5%.

## Ethical consideration

Ethical approval was given by the Muhimbili University of Health and Allied Sciences Institutional Review Board (Reference No. MU/PGS/SAEC/Vol.XI/234) and permission granted by the respective hospitals. All participants were given detailed information about the study and then signed a consent form before data collection began. During consent process, they were given both verbal and written information about the voluntary nature of participation, the guarantee of confidentiality of their information, and the freedom they had to withdraw from the study any time if they felt so; without any consequences to their rights as workers. Numbers were used in the questionnaires instead of names to ensure confidentiality.

## Results

One hundred three (103) ICU nurses participated in the study, response rate 96% of potential study participants. The majority (60.2%) of study participants had diploma in Nursing. More than half (57.3%) had intensive care training, 43.7% had worked in ICU between 1 and 5 years and 72.7% were females “[Table 2](#)”

### Participants' level of knowledge of endotracheal suctioning

Majority of ICU nurses (69.9%) knew the indication of ETS, and 77.7% knew the action to be taken in case of abrupt changes in Electrocardiogram (ECG) monitor but not doing the procedure as per guidelines. However, most (86.4%) didn't know how to choose the appropriate catheter size for the child, and 88.3% didn't know the appropriate way of suctioning the child “[Table 3](#)”.

### Factors associated with knowledge

There was no significant difference in knowledge between nurses with different levels of nursing education ( $p = 0.610$ ), and ICU experiences ( $p = 0.161$ ). However, nurses who had received ICU training demonstrated significantly higher knowledge than those who did not receive training ( $X^2 = 3.854$ ,  $p = 0.049$ ). [Table 4](#) summarizes the findings of factors associated with knowledge.

**Table 2. Participants demographic characteristics.**

| Factors                     | Variables                  | Frequency | Percent |
|-----------------------------|----------------------------|-----------|---------|
| Nursing Education (n = 103) | Certificate                | 18        | 17.5    |
|                             | Diploma                    | 62        | 60.2    |
|                             | Degree                     | 23        | 22.3    |
|                             | Master with specialization | -         | -       |
| ICU Training (n = 103)      | Yes                        | 59        | 57.3    |
|                             | No                         | 44        | 42.7    |
| Work Experience (n = 103)   | < 1 year                   | 31        | 30.1    |
|                             | 1–5 years                  | 45        | 43.7    |
|                             | 6–10 years                 | 19        | 18.4    |
|                             | > 10 years                 | 8         | 7.8     |
| Gender (n = 103)            | Male                       | 28        | 27.2    |
|                             | Female                     | 75        | 72.8    |

<https://doi.org/10.1371/journal.pone.0201743.t002>

### Adherence to ETS evidence based recommendations during practice

Overall, the majority (n = 30, 85.7%) of the observed participants scored less than the desired level (< 50% score), only 5 participants (14.3%) scored at the moderate level (50–75% score) and none scored at the desirable level (76–100% score).

Taking moderate score as the score criteria, there was no association between practice of endotracheal tube suctioning in relation to recommended guidelines and level of education and ICU training. There was no significant difference in practice between those with ICU training and those without (p = 0.812), across the three levels of nursing education (p = 0.356) and across the three strata of nurses' work experiences (p = 0.791). Findings for level of practice in relation to level of nursing education, ICU training and work experience are summarized in "Table 5".

### Practice in relation to recommended guidelines

Technical discrepancies were observed in practices prior and post ETS events. All nurses observed did not auscultate chest 35(100%), did not pre-oxygenate the patient 30(85.7%), and did not check cuff pressure 35(100%) prior to suctioning. Likewise, at post suctioning 26 (74.3%) did not auscultate chest, 27(77.1%) did not hyper-oxygenate the patient and 33(94.3%) did not check cuff pressure. Furthermore, a large proportion of participants were observed not reassuring the patients after the procedure 33(94.3%) whereas 27(77.1%) did not disinfect their hands post-suctioning procedure. Infection control practices were observed to be high on self-protection 34 (97.1%), and maintenance of catheter sterility until inserted into the airway 33(94.3%). Table 6 provides the summary of observed practices of ETS in relation to current recommendations.

### Discussion

Studies about knowledge and practice of ETS among nurses have been conducted in many countries as they predict the safety of patients in critical conditions [6,10,23]. However, little is

**Table 3. Overall scores for level of knowledge.**

| Level   | Number of respondents (n = 103) | Percent (%) |
|---------|---------------------------------|-------------|
| 76–100% | -                               | -           |
| 50–75%  | 20                              | 19.4        |
| < 50%   | 83                              | 80.6        |

<https://doi.org/10.1371/journal.pone.0201743.t003>

**Table 4. Factors associated with knowledge.**

| Factors                    | Variables   | No. of respondents (%)<br>n = 103 | No. of moderate score within the category (%) | X <sup>2</sup> or Fishers exact test of the observed difference | P value |
|----------------------------|-------------|-----------------------------------|-----------------------------------------------|-----------------------------------------------------------------|---------|
| Level of Nursing education | Certificate | 18(17.5%)                         | 2(11.1%)                                      | Fisher's exact test                                             | 0.610   |
|                            | Diploma     | 62(60.2%)                         | 14(22.6%)                                     |                                                                 |         |
|                            | Degree      | 23(22.3%)                         | 4(17.4%)                                      |                                                                 |         |
| ICU training               | Yes         | 59(57.3%)                         | 16(27.1%)                                     | 3.854                                                           | 0.049*  |
|                            | No          | 44(43.7%)                         | 5(11.6%)                                      |                                                                 |         |
| Year of experience         | < 1year     | 31(30.1%)                         | 4(12.9%)                                      | Fisher's exact test                                             | 0.161   |
|                            | 1–5 years   | 45(43.7%)                         | 7(15.6%)                                      |                                                                 |         |
|                            | 6–10 years  | 19(18.4%)                         | 7(36.8%)                                      |                                                                 |         |
|                            | >10 years   | 8(7.8%)                           | 2(25.0%)                                      |                                                                 |         |

X<sup>2</sup>, Chi square

\*, statistically significant.

<https://doi.org/10.1371/journal.pone.0201743.t004>

known from the Tanzanian settings. The fact that about 85% of all nurses who practice at the studied ICUs in Dar es Salaam city were reached and included in the study, with careful management of data and focused analysis, the authors think that the findings are valuable in providing a good picture of safety situation of the critical patients in Dar es Salaam. The findings however, cannot be generalized to the whole Tanzania for the fact that this study did not involve nurses in other referral hospitals outside Dar es Salaam (Kilimanjaro Christian Medical Centre, Bugando Medical Centre and Mbeya Zonal Referral Hospital) which also have ICUs and may have different ICU practice protocols.

Findings of this study enlighten that majority 62(60.2%) of the nurses practicing in the ICUs in Dar es Salaam are diploma holders in nursing education. The high percentage of diploma holders could be explained by the fact that the public service system has only recently started recruitment of nurses at bachelors and masters level, believing that these cadres could have better knowledge and skills of caring for critical patients in the ICUs. The curricula for nurses' training at certificate and diploma levels in Tanzania does not cover the care of critically ill patients, where ETS is part of the package; thus, nurses learn through observation from experienced ones, or through informal training in or outside the hospital.

Although, more than a half 59(57.3%) of respondents had undergone ICU training, the findings however did not reflect the relationship of their training and the percentage of overall

**Table 5. Factors associated with practices.**

| Factors                    | Variables   | No. of respondents observed (%)<br>n = 35 | No. of respondents scored moderate | X <sup>2</sup> or fishers exact test of the observed difference | P value |
|----------------------------|-------------|-------------------------------------------|------------------------------------|-----------------------------------------------------------------|---------|
| Level of nursing education | Certificate | 4(11.4%)                                  | 1                                  | Fisher's exact                                                  | 0.356   |
|                            | Diploma     | 17(48.6%)                                 | 4                                  |                                                                 |         |
|                            | Degree      | 14(40.0%)                                 | -                                  |                                                                 |         |
| ICU training               | Yes         | 19(54.3%)                                 | 3                                  | Mid P exact test                                                | 0.812   |
|                            | No          | 16(45.7%)                                 | 2                                  |                                                                 |         |
| Work experience            | < 1 year    | 12(34.3%)                                 | 1                                  | Fisher's exact test                                             | 0.791   |
|                            | 1 – 5years  | 13(37.1%)                                 | 3                                  |                                                                 |         |
|                            | 6 – 10years | 6(17.1%)                                  | -                                  |                                                                 |         |
|                            | >10 years   | 4(11.4%)                                  | 1                                  |                                                                 |         |

<https://doi.org/10.1371/journal.pone.0201743.t005>

**Table 6. ICU nurses' practice in relation to current recommendations prior to, during and post ETS events.**

| Practices prior to, during and post ETS event (n = 35) | Recommended guidelines for ETS                                      | No.(%) Observed | No.(%) Not observed |
|--------------------------------------------------------|---------------------------------------------------------------------|-----------------|---------------------|
| Practices prior to ETS event                           | Patient assessment: Patient's chest auscultation before ETS         | -               | 35(100%)            |
|                                                        | Pre-suctioning hyper-oxygenation                                    | 5(14.3%)        | 30(85.7%)           |
|                                                        | Cuff pressure checked                                               | -               | 35(100%)            |
|                                                        | Hand disinfection prior to suctioning                               | 15(42.9%)       | 20(57.1%)           |
|                                                        | Self-protection observed                                            | 34(97.1%)       | 1(2.9%)             |
|                                                        | Sterility of suction catheter maintained until inserted into airway | 33(94.3%)       | 2(5.7%)             |
| The ETS event                                          | Sodium chloride instillation                                        | 19(54.3%)       | 16(45.7%)           |
|                                                        | Size of suction catheter ( $\leq$ Half of internal diameter of ETT) | 20(57.1%)       | 15(42.9%)           |
|                                                        | Number of suction passes $\leq$ 2                                   | 17(48.6%)       | 18(51.4%)           |
|                                                        | Duration of suction applied to airway ( $<$ 15 seconds)             | 14(40.0%)       | 21(60.0%)           |
|                                                        | Level of suction pressure 80-120mmHg                                | 21(60.0%)       | 14(40.0%)           |
| Post-ETS practices                                     | Patient reconnected to oxygen within 10 seconds post suctioning     | 17(48.6%)       | 18(51.4%)           |
|                                                        | Post-suctioning hyper oxygenation                                   | 8(22.9%)        | 27(77.1%)           |
|                                                        | Post-ETS assessments: Patient's chest auscultation after suctioning | 9(25.7%)        | 26(74.3%)           |
|                                                        | Patient reassured                                                   | 2(5.7%)         | 33(94.3%)           |
|                                                        | Hand disinfection post suctioning                                   | 8(22.9%)        | 27(77.1%)           |
|                                                        | Proper way of disposing used catheter and gloves post suctioning    | 18(51.4%)       | 17(48.6%)           |
|                                                        | Cuff pressure checked                                               | 2(5.7%)         | 33(94.3%)           |

<https://doi.org/10.1371/journal.pone.0201743.t006>

scores in knowledge of the ETS recommendations. This is spotted with higher scores (80.6%) of undesired level of knowledge of ETS recommendations compared to those who scored at the moderate level (19.4%) and the desired level (0%). This finding is similar to that of Day et al (2001) who also reported low level of knowledge among many ICU nurses in London–United Kingdom [27]. The findings are however, contrasted by the findings of Ansari et al (2012) where higher levels of knowledge among nurses than performance was observed [10]. The present study findings may imply that the trainings given were not sufficient, not as per performance indicators or were not focused in addressing the required skills by ICU nurses [28–30].

Even though it is widely known that infection-control practices are crucial elements in the prevention of cross-infections and transmission of pathogens through hands or equipment [31], this study found that only about half of the nurses would disinfect their hands before ETS procedure and only 22.9 percent disinfected their hands after the procedure. This practice among ICU nurses in Dar es Salaam ICUs alerts a practice that may increase risk of acquiring nosocomial infection.

ETS evidence based recommendations suggests not to administer N/S routinely before suctioning [1], since it can cause oxygen desaturation [32]. However, it was observed in more than half of the respondents in this study, contradicting the ETS recommendations. Nevertheless, as researchers in the less resource settings, we feel that the benefit of saline instillation to patients under non-humidified ventilation may outweigh the disadvantages even though its practice may need caution. While there are few current systematic reviews and meta-analysis [33–35] indicating reduced oxygen 5 minutes post ETS with estimated mean difference of  $-1.14$  (95%CI,  $-2.25$  to  $-0.03$ ) [34], while also admitting the poor quality of included studies, we perceive that these findings are outweighed by the previous review by Paratz and Stockton of 2009 who concluded that N/S instillation may not be harmful in terms of hemodynamics, gas exchange, increased dyspnea or distress [36]. Studies recommend ventilation with humidified oxygen [37], however, this study was conducted in the settings where patients are



commonly ventilated with non-humidified air due to lack of humidifiers, which is expected to lead to drying the mucous membranes of the airways. Suction of the secretions after ventilation with non-humidified air without instillation with normal saline may damage this dried mucous membrane, leading to bleeding and reactions with the ultimate impact to ventilator associated pneumonia. Moreover, studies that disprove instillation of N/S fail to provide solutions of what could be the effective way of ETS where patients had been ventilated with non-humidified air such as in low resource settings.

Also, the study found that although majority of the respondents instilled N/S prior to ETS, most of them did not know the function of N/S to ETS procedure, did not know when to instill and the amount of N/S to be used in adult and children. It is not known whether the practice of instilling NS is a set protocol by the institutions or not since the authors did not find SOPs for ETS placed in the ICUs. Previous studies show that correct performance by nurses in endotracheal suctioning can minimize its undesirable side effects to the patients [27,38,39]. Nurses can, by utilizing evidence-based recommendations in their practice, improve the quality of care hence prevention of unnecessary deaths as well as medical interventions, and decrease the period of hospitalization and patients' expenses.

Our study found the gap between knowledge and practice as pointed out in other studies [10,11,19,27,39]. While nurses who had ICU training demonstrated good knowledge than those who did not have training, this difference was not apparent in their practice. Ansari's research group argues that, theoretical education which is often given as part of continuing courses for nurses may not be adequate to influence change in practical skills needed by the critical care nurses; the situation which our authors think it might have been the case for ICU nurses who had received training in this study, [10]. On the other hand, some of the findings in this study showing failure to adhere to ETS evidence-based recommendations, especially on chest auscultation, hyper oxygenation, hand disinfection and cuff pressure checkup prior to, and post endotracheal suctioning events are controversial in conclusion. As it was apparent that nurses who received ICU training demonstrated knowledge of these recommendations, however could not demonstrate their practice, raises curiosity as to whether the observed poor practice was related to lack of knowledge and skills or carelessness [40]. These phenomena, however; call for further studies to determine the predictors of knowledge and practice gap in our settings.

The promising circumstance is that some studies have revealed that low level of knowledge and practice of nurses can be improved if training that reflect needs is conducted according to established protocol [11,19,39,41].

## Strengths and limitations

The instrument used for assessing nurses' knowledge on ETS was based on current ETS recommendations and reviewed by other colleagues which justifies its validity. However, lack of psychometric testing may limit the comparability of our findings with others. Also, in the analysis of practice, it was not possible to eliminate the Hawthorne effect in the sense that the presence of the researcher somehow affected nurses' practice. However, to minimize this effect, the researcher established a good relationship with nurses and worked in the respective ICUs for three days for nurses to get used with her presence and feel relaxed during their practice, before data collection began [42]

## Conclusions and recommendations

Despite of the possible Hawthorne effect and lack of psychometrics for the assessment instrument, this study found that practice of ICU nurses was not in line with current ETS recommendations. We observed significant discrepancies in knowledge and practices in relation to

current recommendations as well as contrasting relationship between knowledge and its corresponding practice. The perceived barriers could be resistance to change, insufficient training, and lack of support from higher authority. The fact that unsafe ETS practices may jeopardize patient safety, and thus the quality of nursing care, we recommend innovative educational interventions on evidence based ETS recommendations, clinical guidelines coupled with adequate support like mentorship, support systems like guidelines and SOPs be in place. Learning resources such as articles, journals and electronic resources such as computers and internet would perhaps increase nurses' behavior to use evidence-based information in enhancing their skills in their practice. Further studies using analytical approach to identify other factors beyond the scope of this study and testing the best approach in fostering adherence to ETS evidence-based recommendations may be needed.

## Supporting information

**S1 File. Data for sharing.**  
(XLSX)

**S2 File. Questionnaires.**  
(DOCX)

## Acknowledgments

The authors thank all the participants who agreed to respond to questionnaires and accepted for their practice to be observed for the purpose of this study. We also thank the hospital management of the five hospitals in Dar es Salaam; at Muhimbili National Hospital (MNH), Muhimbili Orthopaedic Institute, Agakhan Hospital, Hurbert Kairuki Memorial Hospital, and T. M. J Hospital for letting us conduct the study in their institutions. Our sincere appreciations to Happiness and Salama (nurses at MNH) who assisted in data collection.

## Author Contributions

**Conceptualization:** Emelia T. Mwakanyanga.

**Data curation:** Emelia T. Mwakanyanga.

**Formal analysis:** Emelia T. Mwakanyanga, Golden M. Masika.

**Funding acquisition:** Emelia T. Mwakanyanga.

**Methodology:** Emelia T. Mwakanyanga, Golden M. Masika, Edith A. M. Tarimo.

**Project administration:** Emelia T. Mwakanyanga.

**Supervision:** Emelia T. Mwakanyanga, Edith A. M. Tarimo.

**Validation:** Emelia T. Mwakanyanga.

**Writing – original draft:** Emelia T. Mwakanyanga, Golden M. Masika.

**Writing – review & editing:** Emelia T. Mwakanyanga, Golden M. Masika, Edith A. M. Tarimo.

## References

1. Spears N, Cook N, Garcia K. Instillation of Normal Saline in Endotracheal Suctioning. Pharm Nurs Student Res Evidence-Based Med Poster Sess Pap 15 [Internet]. 2012 [cited 2015 Jan 4]; Available from: [http://digitalcommons.cedarville.edu/pharmacy\\_nursing\\_poster\\_session/15/](http://digitalcommons.cedarville.edu/pharmacy_nursing_poster_session/15/)

2. Jansson M, Ala-Kokko T, Ylipalosaari P, Kyngäs H. Evaluation of endotracheal-suctioning practices of critical-care nurses—An observational correlation study. *J Nurs Educ Pract* [Internet]. 2013 Jan 14 [cited 2014 Dec 17]; 3(7):99–105. Available from: <http://www.sciedu.ca/journal/index.php/jnep/article/view/1586>
3. Favretto DO, Silveira RC, Canini SR, Garbin LM, Martins FT DM. Endotracheal Suction in Intubated Critically Ill Adult Patients Undergoing Mechanical Ventilation: a Systematic Review. *Rev Lat Am Enferm*. 2012; 20(5):997–1007.
4. Morrow, Brenda M. PhD; Argent ACFcpS. A comprehensive review of pediatric endotracheal suctioning: Effects, indications, and clinical practice\*. *BJU International*. 2008. p. 465–77.
5. Royal University Hospital, Saskatoon City Hospital, St. Paul's Hospital. Suctioning—Pediatric / Neonate Patients Ventilated (Conventional and High Frequency) Via Artificial Airways. 2017.
6. Haghghat S, Yazdannik A. The practice of intensive care nurses using the closed suctioning system: An observational study. *Iran J Nurs Midwifery Res* [Internet]. 2015; 20(5):619–25. Available from: <http://www.ncbi.nlm.nih.gov/pubmed/26457102> <http://www.pubmedcentral.nih.gov/articlerender.fcgi?artid=PMC4598911> <https://doi.org/10.4103/1735-9066.164509> PMID: 26457102
7. Pedersen C, ... MR-N. La aspiración endotraqueal del paciente adulto intubado—¿Cuál es la evidencia? *Intensiva, Crítica* ... 2009.
8. Day T, Farnell S, Haynes S, Wainwright S, Wilson-Barnett J. Tracheal suctioning: an exploration of nurses' knowledge and competence in acute and high dependency ward areas. *J Adv Nurs* [Internet]. 2002 Jul [cited 2015 Jan 4]; 39(1):35–45. Available from: <http://doi.wiley.com/10.1046/j.1365-2648.2002.02240.x> PMID: 12074750
9. Davies K. Determining Standard Criteria for Endotracheal Suctioning in the Paediatric Intensive Care Patient: An Exploratory Study. *Determining Standard Criteria for Endotracheal Suctioning in the Paediatric Intensive Care Patient: An Exploratory Study*. 2008;(September):157–76.
10. Ansari A, Alavi NM. The gap between knowledge and practice in standard endo-tracheal suctioning of ICU nurses, Shahid Beheshti Hospital. ... *Crit Care Nurs*. 2012; 5(2):71–6.
11. Hadian ZS, Sabet RS. The effect of endotracheal tube suctioning education of nurses on decreasing pain in premature neonates. *Iran J Pediatr*. 2013; 23(3):340–4. PMID: 23795259
12. Özden D, Görgülü RS. Development of standard practice guidelines for open and closed system suctioning. *J Clin Nurs* [Internet]. 2012 May [cited 2015 Jan 4]; 21(9–10):1327–38. Available from: <http://www.ncbi.nlm.nih.gov/pubmed/22390197> <https://doi.org/10.1111/j.1365-2702.2011.03997.x> PMID: 22390197
13. Fisk AC. The effects of endotracheal suctioning in the pediatric population: An integrative review. *Dimens Crit Care Nurs*. 2018; 37(1):44–56. <https://doi.org/10.1097/DCC.0000000000000275> PMID: 29194174
14. Bruschetti M, Zappettini S, Moja L, Calevo MG. Frequency of endotracheal suctioning for the prevention of respiratory morbidity in ventilated newborns. *Cochrane Database Syst Rev*. 2015; 2015(1).
15. Suctioning E, Ventilated M, With P, Airways A. *AARC Clinical Practice Guidelines Endotracheal Suctioning of Mechanically Ventilated Patients With Artificial Airways* 2010. 2010;(January 1990):758–64.
16. Rolls K, Rand Butcher, Smith K, Kent B, Jones P, Chaboyer W, et al. *Suctioning an Adult with a Tracheal Tube NSW Health Statewide Guidelines for Intensive Care*. Queensland, Australia; 2010.
17. Martin KT. *Suctioning the Airway*. Vol. 5798. Riverside, CA: RC Educational Consulting Services, Inc.; 2008.
18. Morrow B, Futter M, Argent A. Effect of endotracheal suction on lung dynamics in mechanically-ventilated paediatric patients. *Aust J Physiother* [Internet]. 2006 [cited 2015 Jan 4];52. Available from: <http://www.sciencedirect.com/science/article/pii/S0004951406700472>
19. Ania González N, Martínez Mingo A, Eseberri Sagardoy M, Angeles Margall Coscojuela M., Carmen Asiain Erro M. Evaluación de la competencia práctica y de los conocimientos científicos de enfermeras de UCI en la aspiración endotraqueal de secreciones. *Enfermería Intensiva* [Internet]. 2004 Jan [cited 2015 Jan 4]; 15(3):101–11. Available from: <http://linkinghub.elsevier.com/retrieve/pii/S1130239904781511>
20. Swartz K, Noonan DM, Edwards-Beckett J. A national survey of endotracheal suctioning techniques in the pediatric population. *Hear Lung J Acute Crit Care* [Internet]. 2017 Oct 5; 25(1):52–60. Available from: [http://dx.doi.org/10.1016/S0147-9563\(96\)80013-6](http://dx.doi.org/10.1016/S0147-9563(96)80013-6)
21. Negro A, Ranzani R, Villa M, Manara D. Survey of Italian intensive care unit nurses' knowledge about endotracheal suctioning guidelines. *Intensive Crit Care Nurs* [Internet]. 2014; 30(6):339–45. Available from: <https://doi.org/10.1016/j.iccn.2014.06.003> PMID: 25193542
22. Leddy R, Wilkinson JM. Endotracheal suctioning practices of nurses and respiratory therapists: How well do they align with clinical practice guidelines? *Can J Respir Ther CJRT = Rev Can Ia Ther Respir*

- RCTR [Internet]. 2015; 51(3):60–4. Available from: <http://www.ncbi.nlm.nih.gov/pubmed/26283870%5Cnhttp://www.pubmedcentral.nih.gov/articlerender.fcgi?artid = PMC4530836>
23. Leddy R, Wilkinson JM. Endotracheal suctioning practices of nurses and respiratory therapists: How well do they align with clinical practice guidelines? *Can J Respir Ther CJRT = Rev Can la Ther Respir RCTR*. 2015; 51(3):60–4.
  24. Negro A, Ranzani R, Villa M, Manara D. Survey of Italian intensive care unit nurses' knowledge about endotracheal suctioning guidelines. *Intensive Crit Care Nurs*. 2014; 30(6):339–45. <https://doi.org/10.1016/j.iccn.2014.06.003> PMID: 25193542
  25. Said AT. Knowledge and practice of intensive care nurses on prevention of Ventilator Associated Pneumonia At Muhimbili National Hospital, Dar ES Salaam Tanzania [Internet]. MSc Nursing (Critical Care and Trauma) Dissertation. Muhimbili University of Health and Allied Sciences; 2012. Available from: <http://ir.muhas.ac.tz:8080/jspui/bitstream/123456789/588/1/2012-11-05-CORRECTEDyamwisho.pdf>
  26. Pedersen C, M R-N, J H, I E. Endotracheal suctioning of the adult intubated patient—What is the evidence? *Intensive Crit Care Nurs* 2009 [Internet]. 2009 [cited 2015 Jan 4]; 25(1):2009. Available from: <http://www.sciencedirect.com/science/article/pii/S0964339708000566>
  27. Day T, Wainwright SP, Wilson-Barnett J. An evaluation of a teaching intervention to improve the practice of endotracheal suctioning in intensive care units. *J Clin Nurs* [Internet]. 2001 Sep 15 [cited 2015 Jan 4]; 10(5):682–96. Available from: <http://doi.wiley.com/10.1046/j.1365-2702.2001.00519.x> PMID: 11822519
  28. Quinton S, Higgins Y. Critical care training needs analysis for ward staff. *Crit Care* [Internet]. 2003 Mar 3; 7(Suppl 2):P239–P239. Available from: <http://www.ncbi.nlm.nih.gov/pmc/articles/PMC3301684/>
  29. Kol E, İlaslan E, Turkay M. Training needs of clinical nurses at an university hospital in Turkey. *Nurse Educ Pract*. 2017; 22:15–20. <https://doi.org/10.1016/j.nepr.2016.11.004> PMID: 27889623
  30. Haniffa R, Lubell Y, Cooper BS, Mohanty S, Alam S, Karki A, et al. Impact of a structured ICU training programme in resource-limited settings in Asia. *PLoS One*. 2017; 12(3):1–13.
  31. Pittet D, Allegranzi B, World Health Organization World Alliance for Patient Safety Challenge Core Group of Experts. The World Health Organization guidelines on hand hygiene in health care and their consensus recommendations. *Infect Control Hosp Epidemiol* [Internet]. 2009 [cited 2015 Jan 4]; 30(7):600379. Available from: <http://www.jstor.org/stable/10.1086/600379>
  32. Iranmanesh S, Rafiei H. Normal saline instillation with suctioning and its effect on oxygen saturation, heart rate, and cardiac rhythm. *Int J Nurs Educ* [Internet]. 2010 [cited 2015 Jan 4]; 1(2). Available from: <http://www.i-scholar.in/index.php/ijne/article/view/46123>
  33. Caparros ACS, Forbes A. Mechanical ventilation and the role of saline instillation in suctioning adult intensive care unit patients: An evidence-based practice review. *Dimens Crit Care Nurs*. 2014; 33(4):246–53. <https://doi.org/10.1097/DCC.000000000000049> PMID: 24895955
  34. Wang CH, Tsai JC, Chen SF, Su CL, Chen L, Lin CC, et al. Normal saline instillation before suctioning: A meta-analysis of randomized controlled trials. *Aust Crit Care* [Internet]. 2017; 30(5):260–5. Available from: <https://doi.org/10.1016/j.aucc.2016.11.001> PMID: 27876258
  35. Ayhan H, Tastan S, İyigun E, Akamca Y, Arıkan E, Sevim Z. Normal saline instillation before endotracheal suctioning: “What does the evidence say? What do the nurses think?“. *Multimethod study*. *J Crit Care* [Internet]. 2015; 30(4):762–7. Available from: <https://doi.org/10.1016/j.jccr.2015.02.019> PMID: 25841280
  36. Paratz J, Stockton K. Efficacy and safety of normal saline instillation: a systematic review. *Physiotherapy* [Internet]. 2009 [cited 2015 Jan 4]; 95(4):241–50. Available from: <http://www.sciencedirect.com/science/article/pii/S0031940609000625> <https://doi.org/10.1016/j.physio.2009.06.002> PMID: 19892088
  37. Al Ashry HS, Modrykamien AM. Humidification during mechanical ventilation in the adult patient. *Biomed Res Int*. 2014; 2014.
  38. Maggiore SM, Lellouche F, Pignataro C, Girou E, Maitre B, Richard J-CM, et al. Decreasing the Adverse Effects of Endotracheal Suctioning During Mechanical Ventilation by Changing Practice. *Respir Care*. 2013; 58(10):1588–97. <https://doi.org/10.4187/respcare.02265> PMID: 23466423
  39. Kelleher S, Andrews T. An observational study on the open-system endotracheal suctioning practices of critical care nurses. *J Clin Nurs* [Internet]. 2008 Feb [cited 2015 Jan 4]; 17(3):360–9. Available from: <http://www.ncbi.nlm.nih.gov/pubmed/18205692> <https://doi.org/10.1111/j.1365-2702.2007.01990.x> PMID: 18205692
  40. Reader TW, Gillespie A. Patient neglect in healthcare institutions: a systematic review and conceptual model. *BMC Health Serv Res* [Internet]. 2013; 13(1):156. Available from: <http://bmchealthservres.biomedcentral.com/articles/10.1186/1472-6963-13-156>
  41. Kargar M, Shirazi ZH, Edraki M, Pishva N. The Effects of ETT Suction Education on the Knowledge and Performance of Intensive Care Nurses. *Anaesthesia, Pain Intensive Care*. 2008; 12(1):5–10.

42. Oswald D. Handling the Hawthorne effect: The challenges surrounding a participant observer. *Rev Soc Stud* [Internet]. 2014; 1(1):53–73. Available from: <http://www.rossjournal.co.uk/wp-content/uploads/2016/12/RoSS-Vol1-No1-Oswald-et-al-53-73.pdf>
